# Supplementary material for: Parasitology as a Teaching Tool: Isolation of Apicomplexan Cysts from Store-bought Meat
Source: Atypon-hosted journal article supplement (doi:10.1187/cbe.07-08-0062), 2008-06-01
Supplement: suppmat.pdf [file suppmat.pdf]

## Supplemental Materials and Methods section

### ***Microscopy Terms***

- Two things that limit light microscopy:
  - 1) Size of the wavelength
  - 2) Numerical aperture (pupil of the objective, the larger it is, the higher the resolution)
- Resolution (differentiate between two points) versus enlargement (make larger)
- Giemsa Stain
- Phase contrast microscopy
- Bright field microscopy

### ***Giemsa Stain***

The Giemsa stain is clearly visible on standard light microscopes. This stain clearly differentiates between different cellular structures.

|                                 |                           |
|---------------------------------|---------------------------|
| Collagen, muscle.....           | pale pink                 |
| Microorganisms, parasites.....  | purplish-blue             |
| Starch granules, cellulose..... | sky blue                  |
| Pigments.....                   | green                     |
| Nuclei.....                     | dark blue to violet       |
| Cytoplasm.....                  | varying light blue shades |

### ***Suggested Vocabulary List/Topics to Discuss with Class***

(in no way an exhaustive list but rather a suggested starting point)

- Aliquot (verb versus noun, when is it appropriate?)
- Tachyzoite/Bradyzoite/Oocyst
- Symbiosis (phoresis, mutualism, commensualism)
- Parasitism (and things like ecto vs. endoparasite)
- Plastid
- Apical organelles
- Seroconversion (changing from Toxo (exposure to pathogen) – negative to Toxo-positive)
- Immunocompromised
- Biosafety
- Homogenize
- Supernatant
- Pellet
- Non-ionic
- Surfactant
- Detergent, denature, micelle
- Dilutions
- Conversion Factors
- Density
- Molarity
- Osmolarity

*Suggested Topic List*

AIDS

Infectious Disease

Parasitology (for those wishing an in-depth study on the history of parasitology, we recommend reading the review by Cox 2002 CLINICAL MICROBIOLOGY REVIEWS, Oct. 2002, p. 595–612 Vol. 15, No. 4)

Definition of a cell

Cell Doctrine

Pasteur's Germ Theory

Food Safety

Pregnancy

Pet ownership

Public Health

Food recalls (topical news items)

Morbidity and Mortality Weekly Reports (MMWR) ([www.cdc.gov/mmwr/](http://www.cdc.gov/mmwr/))
